# Supplementary material for: “Nanoarmoured” droplets of different shapes formed by interfacial self-assembly and crosslinking of metal nanoparticles
Source: Royal Society of Chemistry journal article supplement (doi:10.1039/c0nr00381f), 2010-01-01
Supplement: text.pdf [file text.pdf]

To view these video files you will need to have the xvid codec installed. This can be installed from: <http://www.xvid.org/>
